# Supplementary material for: Optimizing Ultrasound-Assisted Deep Eutectic Solvent Extraction of Bioactive Compounds from Chinese Wild Rice
Source: PubMed Central journal article supplement (PMC6696331; doi:10.3390/molecules24152718), 2019-07-26

# Optimizing Ultrasound-Assisted Deep Eutectic Solvent Extraction of Bioactive Compounds from Chinese Wild Rice

Jia Zeng <sup>1,2,†</sup>, Yuqing Dou <sup>1,†</sup>, Ning Yan <sup>1</sup>, Na Li <sup>1,2</sup>, Huaibao Zhang <sup>1,\*</sup> and Jia-Neng Tan <sup>1,3,\*</sup>

<sup>1</sup> Tobacco Research Institute of Chinese Academy of Agricultural Sciences, Qingdao 266101, China

<sup>2</sup> Graduate School of Chinese Academy of Agricultural Sciences, Beijing 100081, China

<sup>3</sup> Key Laboratory of Oilseeds Processing, Ministry of Agriculture, Wuhan 430062, China

\* Correspondence: zhanghuaibao@caas.cn (H.Z.); tanjianeng@caas.cn (J.-N.T.); Tel.: +86-532-8870-2052; Fax: +86-532-8870-2239 (H.Z.)

† These authors contributed equally to this work.

**Table S1**

Parameters of linear regression, concentration rang, LOD and LOQ of the analyzed standards.

| standards                     | Regression equation    | Concentration rang (µg/g) | R <sup>2</sup> | LOD (ng/mL) | LOQ (ng/mL) |
|-------------------------------|------------------------|---------------------------|----------------|-------------|-------------|
| Vanillin                      | y = 330396x + 58002.6  | 0.30–30                   | 0.9972         | 7.073       | 23.278      |
| <i>p</i> -Hydroxybenzaldehyde | y = 37875x + 10863.4   | 0.2–20                    | 0.9992         | 1.493       | 6.563       |
| <i>p</i> -Hydroxybenzoic acid | y = 195770x + 3998.1   | 0.2–20                    | 0.9993         | 6.374       | 22.570      |
| <i>p</i> -Coumaric acid       | y = 627355x + 29881.7  | 0.05–5                    | 0.9995         | 3.547       | 13.621      |
| Protocatechuic acid           | y = 32574x + 424.713   | 0.2–20                    | 0.9998         | 1.348       | 5.704       |
| Syringic acid                 | y = 16972x + 12950.9   | 0.02–10                   | 0.9989         | 7.469       | 25.581      |
| Ferulic acid                  | y = 18581.6x – 40196.1 | 0.5–120                   | 0.9944         | 3.241       | 10.834      |
| Sinapic acid                  | y = 222815x + 65084    | 0.5–120                   | 0.9995         | 4.684       | 15.302      |
| Vanillic acid                 | y = 341171x – 73698.3  | 0.2–20                    | 0.9921         | 7.561       | 16.320      |
| Catechin                      | y = 39552.9x – 23122.9 | 0.5–25                    | 0.9998         | 9.747       | 30.422      |
| Procyanidin B1                | y = 29832.4x – 16919.9 | 0.5–20                    | 0.9985         | 4.360       | 14.071      |
| Quercetin                     | y = 235670x – 42503    | 0.5–20                    | 0.9924         | 0.479       | 2.690       |

The Regression equation was constructed by plotting the peak area versus the concentration of each standard. LOD, limits of detection. LOQ, limits of quantification.

**Fig. S1**

The UPLC-MS/MS TIC spectrum of the standards.

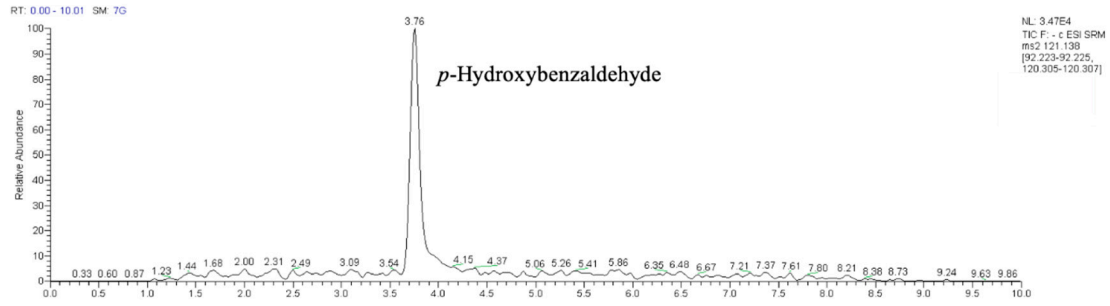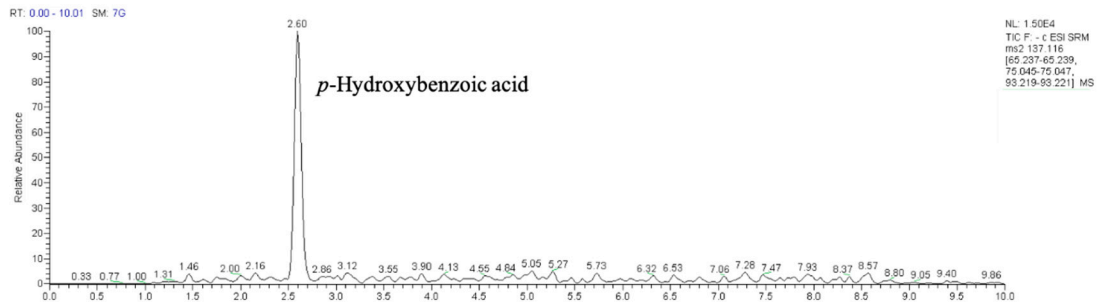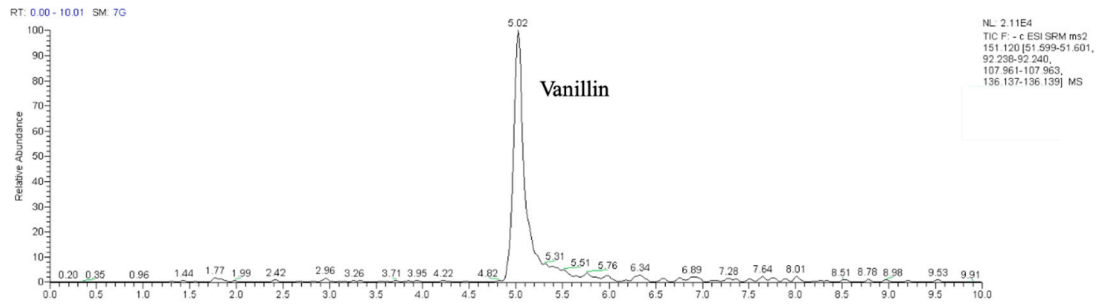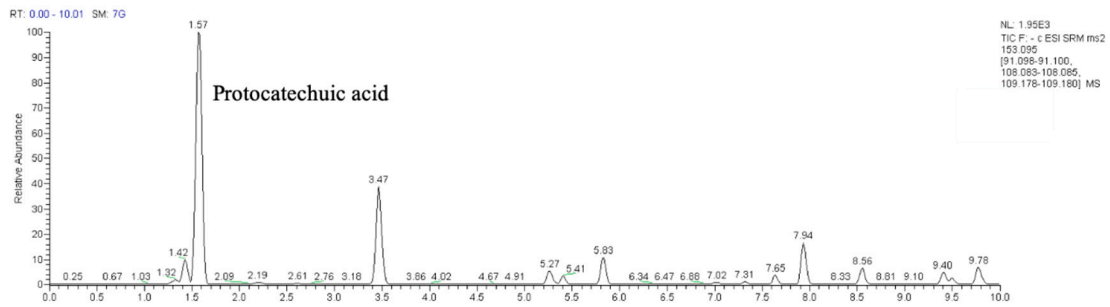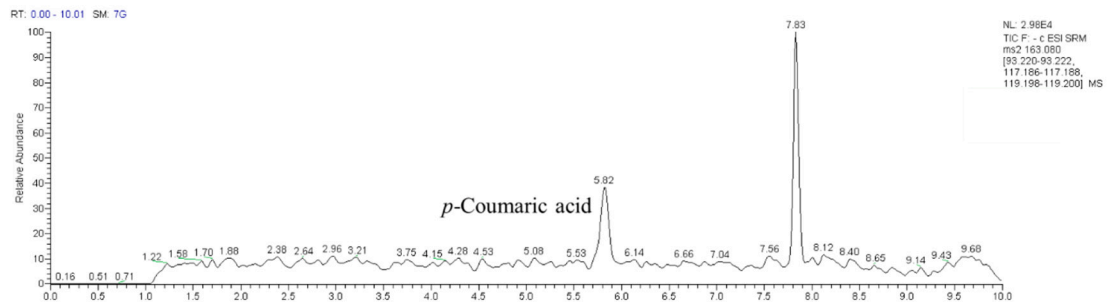

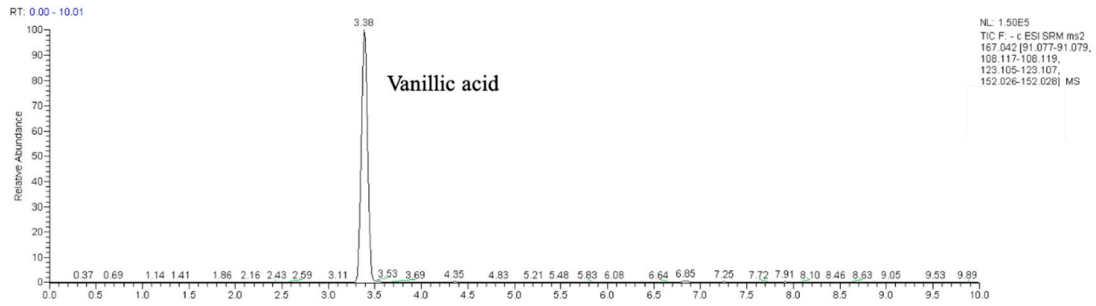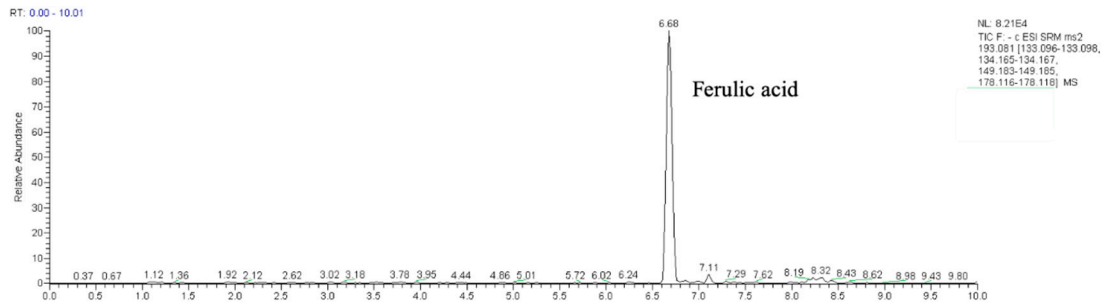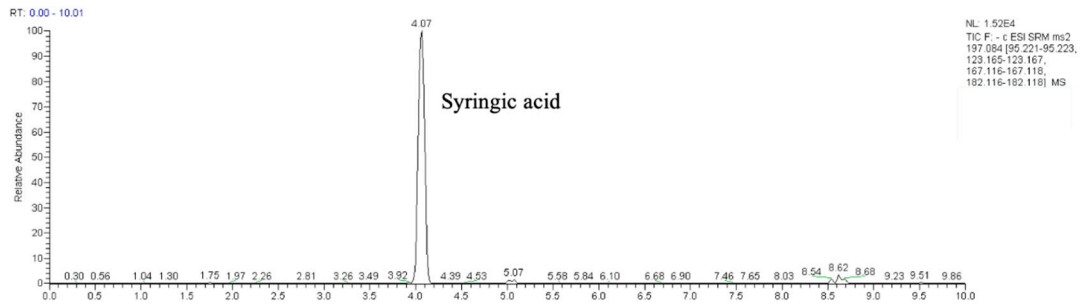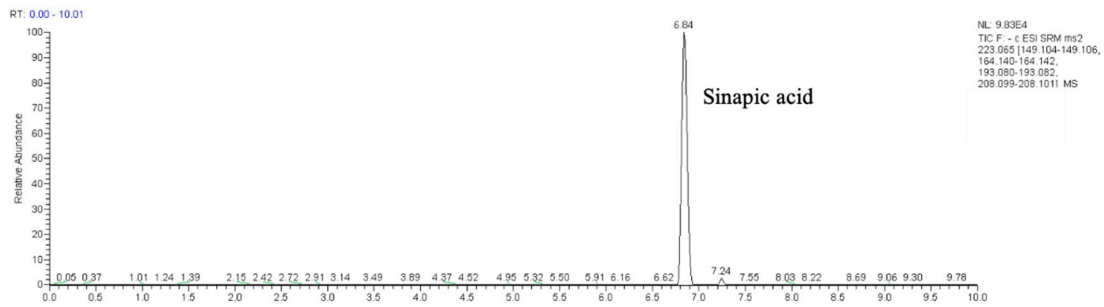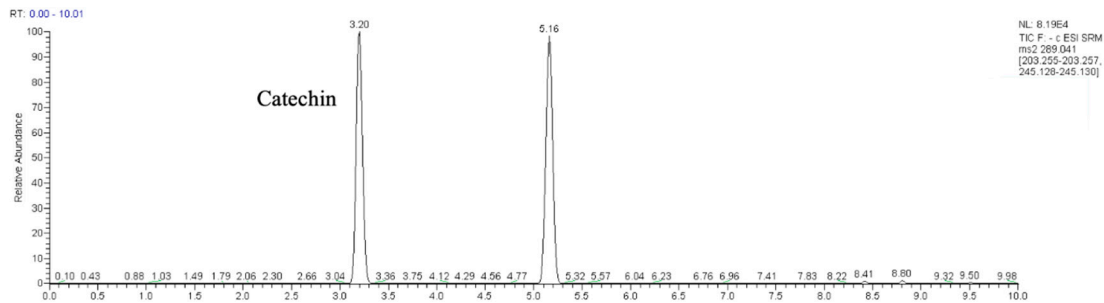

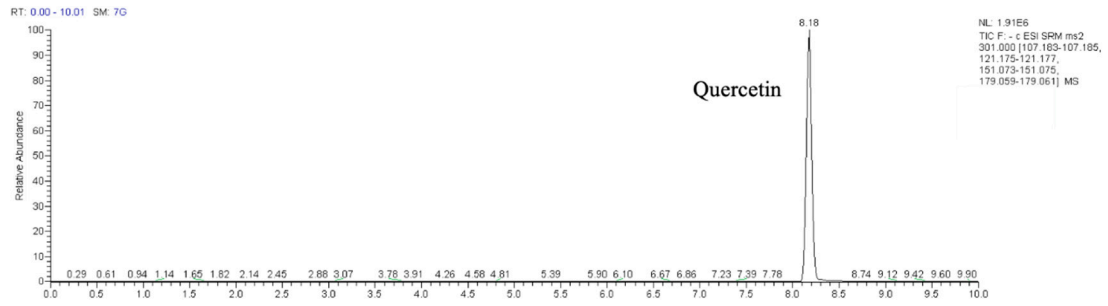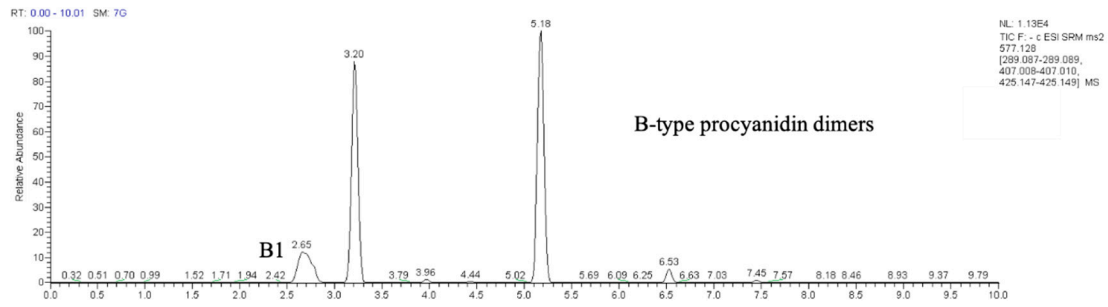

**Fig.S2**

Correlations between (a) TFC and DPPH assay results, (b) TFC and ABTS assay results.

(a)

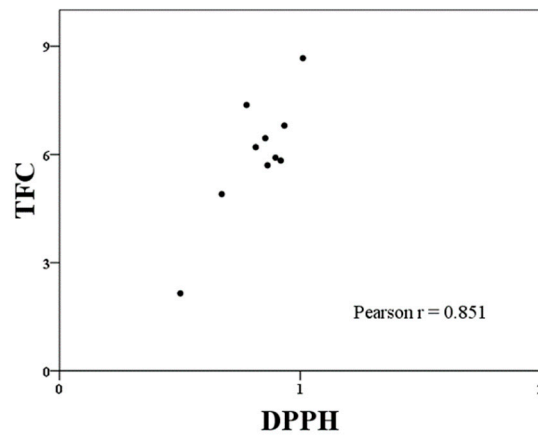

(b)

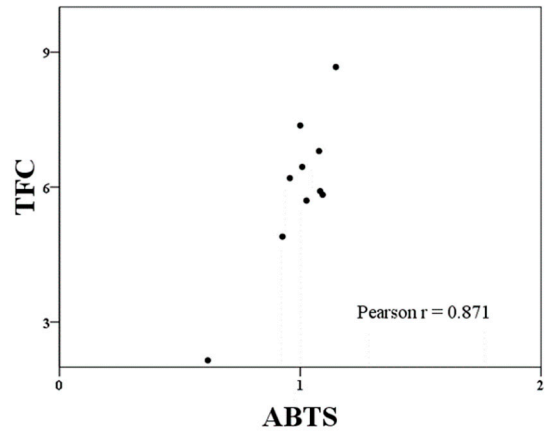

Supplement: molecules-24-02718-s001.pdf [file molecules-24-02718-s001.pdf]
